# Supplementary material
Source: Springer Nature journal article supplement (https://www.springermedizin.de/resource/supplementary/13256_2010_1497_MOESM7_ESM.pdf/9647772)

Se:605  
Im:9

[A]

[R]

NEEDLE POSITION

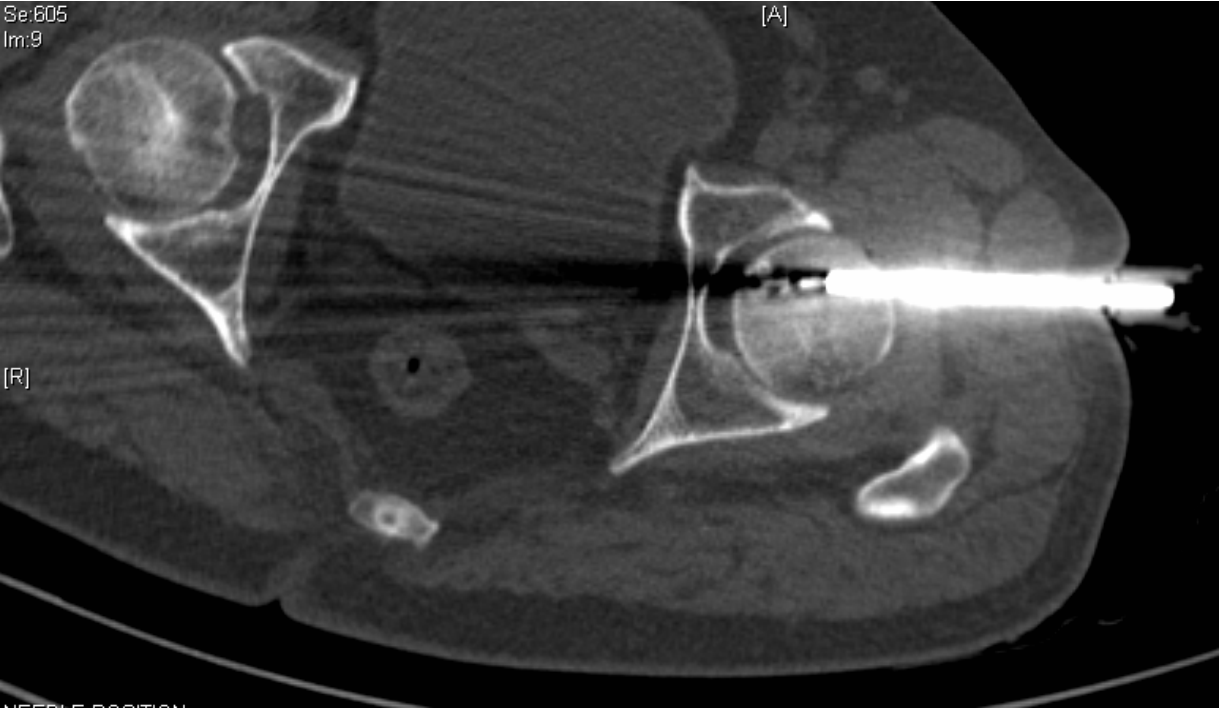

Supplement: MOESM7 [file 9647772]
